# Supplementary material
Source: MDPI journal article supplement (https://www.mdpi.com/1424-2818/14/1/51)
Supplement: s1 [file s1]

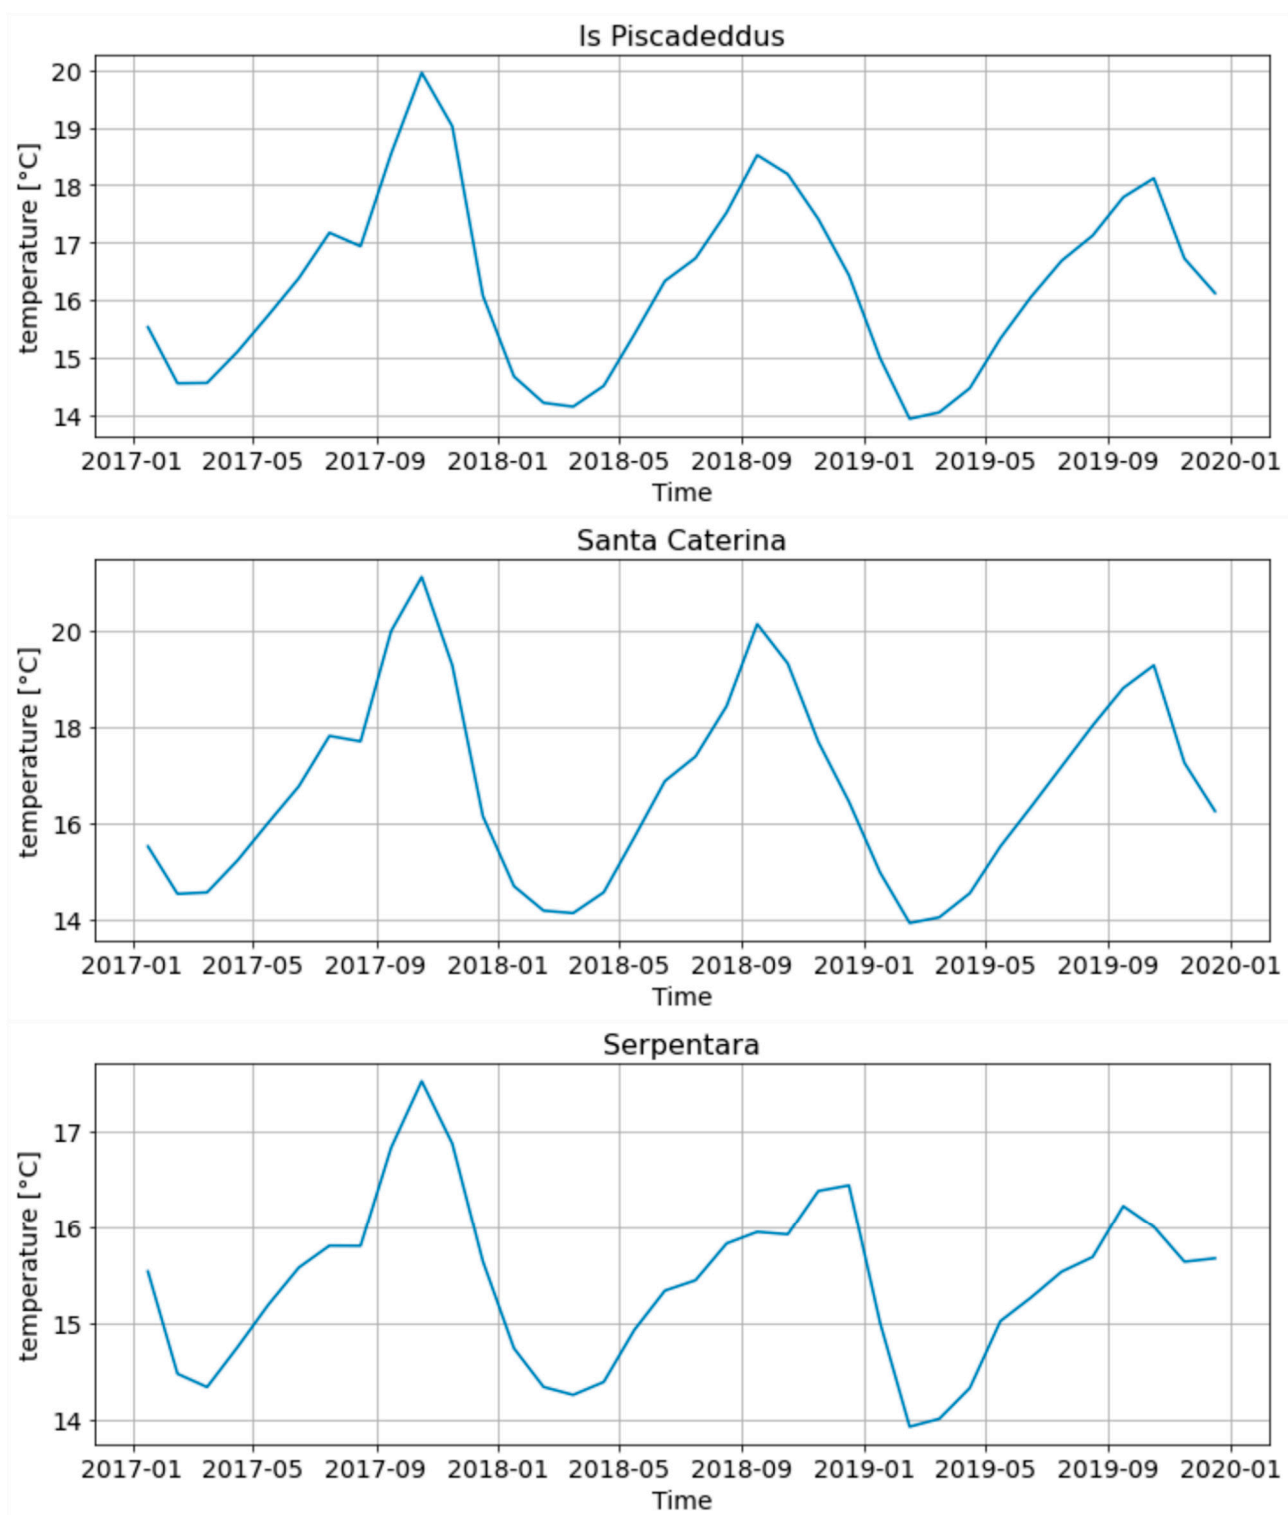

**Figure S1.** Monthly three-dimensional temperature obtained from the high-resolution Mediterranean Sea MFC (Monitoring and Forecasting Centre) physical reanalysis product (MEDSEA) [39], retrieved from the E.U. Copernicus Marine Service Information platform, available at [https://resources.marine.copernicus.eu/productdetail/MEDSEA\\_MULTI-YEAR\\_PHY\\_006\\_004/INFORMATION](https://resources.marine.copernicus.eu/productdetail/MEDSEA_MULTI-YEAR_PHY_006_004/INFORMATION) (accessed on 3 December 2021).
