# Supplementary material
Source: MDPI journal article supplement (https://www.mdpi.com/1424-2818/14/1/51)
Supplement: s1 [file s1]

File S1. Results of the ANOVAs test and SNK tests.

1)

(a): Results of the ANOVAs to test for differences in the coverage area of pralines among sites (Si: Is Piscadeddus *vs* Serpentara *vs* Santa Caterina) and sizes (Sz: < 2cm *vs* >2cm). Significant results are given in bold. (b): Results of the posteriori comparisons (SNK test) for the interaction SixSz for pralines and branches respectively.

| Pralines      |    |                          |               |
|---------------|----|--------------------------|---------------|
|               | DF | F                        | P             |
| Site (Si)     | 1  | 11.53                    | <b>0.0016</b> |
| Size (Sz)     | 1  | 0.13                     | 0.7259        |
| SixSz         | 2  | 4.21                     | 0.0412        |
| RES           | 12 |                          |               |
| TOT           | 17 |                          |               |
| Cochran test: |    | 0.4402 (Not Significant) |               |

| (b) SNK test a posteriori Pralines (SixSz) |                                          |
|--------------------------------------------|------------------------------------------|
| Size                                       | Site                                     |
| < 2 cm                                     | Is Piscadeddus=Serpentara=Santa Caterina |
| > 2cm                                      | Is Piscadeddus=Serpentara=Santa Caterina |
| Site                                       | Size                                     |
| <i>Is Piscadeddus</i>                      | < 2cm = > 2cm                            |
| <i>Santa Caterina</i>                      | < 2 cm < > 2cm                           |
| <i>Serpentara</i>                          | < 2cm = > 2cm                            |
| S.E. = 34.0815                             |                                          |

2)

(a): Results of the ANOVA to test for differences in the coverage area of pralines and branches among sites (Si: Is Piscadeddus *vs* Serpentara *vs* Santa Caterina) and morphotypes (Mo: boxwork *vs* pralines *vs* branches). Significant results are given in bold. (b): Results of the posteriori comparisons (SNK test) for the interaction SixMo.

| <b>(a) ANOVA</b>                       |    |       |               |
|----------------------------------------|----|-------|---------------|
|                                        | DF | F     | P             |
| Site (Si)                              | 2  | 43.35 | <b>0.0000</b> |
| Morphotype (Mo)                        | 2  | 29.39 | <b>0.0000</b> |
| SixMo                                  | 4  | 11.9  | <b>0.0001</b> |
| RES                                    | 18 |       |               |
| TOT                                    | 26 |       |               |
| Cochran test: 0.4694 (Not Significant) |    |       |               |

| <b>(b) SNK test a posteriori (SixMo)</b> |                                          |
|------------------------------------------|------------------------------------------|
| <b>Morphotype</b>                        | <b>Site</b>                              |
| <i>Boxwork</i>                           | Is Piscadeddus=Serpentara<Santa Caterina |
| <i>Pralines</i>                          | Is Piscadeddus<Santa Caterina=Serpentara |
| <i>Branches</i>                          | Is Piscadeddus=Santa Caterina=Serpentara |
| <b>Site</b>                              | <b>Morphotype</b>                        |
| <i>Is Piscadeddus</i>                    | Boxwork<Pralines=Branches                |
| <i>Santa Caterina</i>                    | Branches<Boxwork=Pralines                |
| <i>Serpentara</i>                        | Boxwork<Branches<Pralines                |
| S.E. = 1.4147                            |                                          |

3)

(a): Results of the ANOVA to test for differences in the weight percentage of grain size (Gs) among sites (Si: Is Piscadeddus *vs* Serpentara *vs* Santa Caterina) and grain sizes (Gs: mud *vs* sand *vs* gravel). Significant results are given in bold. (b): Results of the posteriori comparisons (SNK test) for the interaction SixGs.

| <b>(a) ANOVA</b>                       |    |        |               |
|----------------------------------------|----|--------|---------------|
|                                        | DF | F      | P             |
| Site (Si)                              | 2  | 212.56 | <b>0.0000</b> |
| Grain size (Gs)                        | 2  | 432.54 | <b>0.0000</b> |
| SixGs                                  | 4  | 33.09  | <b>0.0000</b> |
| RES                                    | 18 |        |               |
| TOT                                    | 26 |        |               |
| Cochran test: 0.4413 (Not Significant) |    |        |               |

| <b>(b) SNK test a posteriori (SixGs)</b> |                                          |
|------------------------------------------|------------------------------------------|
| <b>Grain size</b>                        | <b>Site</b>                              |
| <i>Mud</i>                               | Santa Caterina=Serpentara<Is Piscadeddus |
| <i>Sand</i>                              | Serpentara<Santa Caterina=Is Piscadeddus |
| <i>Gravel</i>                            | Is Piscadeddus<Santa Caterina<Serpentara |
| <b>Site</b>                              | <b>Morphotype</b>                        |
| <i>Is Piscadeddus</i>                    | Gravel=Mud<Sand                          |
| <i>Santa Caterina</i>                    | Mud<Gravel<Sand                          |
| <i>Serpentara</i>                        | Mud<Gravel<Sand                          |
| S.E. = 2.4851                            |                                          |
