# Supplementary material
Source: MDPI journal article supplement (https://www.mdpi.com/1424-2818/14/1/51)
Supplement: s1 [file s1]

**Table S1.** Measures of the Long, Intermediate and Short axes of boxwork and praline rhodoliths of the three studied sites.

| Replica          | Morphotype | Measurements |                  |            |
|------------------|------------|--------------|------------------|------------|
|                  |            | Long (cm)    | Intermediate(cm) | Short (cm) |
| Is Piscadeddus 1 | Pralines   | 3.4          | 2.9              | 2.8        |
|                  |            | 3.8          | 3.4              | 1.3        |
|                  |            | 2.7          | 2.4              | 2.1        |
|                  |            | 2.3          | 1.8              | 1.5        |
|                  |            | 2.0          | 1.7              | 1.6        |
| Is Piscadeddus 2 | Pralines   | 4.0          | 3.1              | 2.1        |
|                  |            | 3.7          | 1.5              | 0.6        |
|                  |            | 4.1          | 2.1              | 1.2        |
|                  |            | 2.9          | 2.8              | 1.7        |
|                  |            | 2.2          | 1.3              | 1.0        |
| Is Piscadeddus 3 | Pralines   | 7.1          | 6.4              | 1.6        |
|                  |            | 4.0          | 2.5              | 1.8        |
| Santa Caterina 1 | Boxwork    | 9.9          | 6.8              | 4.5        |
|                  |            | 7.6          | 6.4              | 5.1        |
|                  |            | 6.3          | 5.8              | 4.0        |
|                  |            | 7.5          | 6.3              | 4.6        |
|                  |            | 5.9          | 4.5              | 3.7        |
|                  |            | 5.8          | 4.3              | 3.9        |
|                  |            | 7.9          | 6.0              | 2.5        |
|                  |            | 6.3          | 4.8              | 3.7        |
|                  |            | 5.9          | 5.5              | 3.2        |
|                  |            | 6.0          | 4.0              | 2.2        |
|                  |            | 5.4          | 4.4              | 3.8        |
|                  |            | 5.1          | 3.9              | 2.9        |
|                  |            | 5.6          | 4.5              | 2.9        |
|                  |            | 4.6          | 3.8              | 2.2        |
|                  |            | 5.2          | 4.0              | 3.3        |
|                  |            | 4.7          | 4.4              | 3.5        |
|                  |            | 5.0          | 3.7              | 2.6        |
|                  |            | 3.8          | 3.1              | 1.7        |
|                  |            | 3.6          | 3.1              | 1.8        |
|                  |            | 3.8          | 2.5              | 1.4        |
|                  |            | 3.3          | 3.2              | 2.5        |
|                  |            | 3.0          | 2.4              | 1.6        |
|                  | Pralines   | 4.1          | 2.6              | 2.3        |
|                  |            | 5.1          | 3.9              | 3.4        |
|                  |            | 4.0          | 3.0              | 2.1        |
|                  |            | 4.0          | 2.6              | 1.9        |
|                  |            | 3.5          | 2.8              | 2.2        |
|                  |            | 3.1          | 3.0              | 2.3        |
|                  |            | 3.2          | 2.7              | 2.1        |
|                  |            | 3.0          | 2.9              | 1.6        |
|                  |            | 3.7          | 2.6              | 2.0        |
|                  |            | 3.2          | 2.6              | 2.2        |

|                  |          |     |     |     |
|------------------|----------|-----|-----|-----|
|                  |          | 3.6 | 3.4 | 0.8 |
|                  |          | 3.7 | 3.4 | 1.3 |
|                  |          | 3.2 | 2.3 | 1.3 |
|                  |          | 3.1 | 3.0 | 1.7 |
|                  |          | 2.6 | 2.3 | 1.4 |
|                  |          | 2.5 | 2.5 | 1.3 |
|                  |          | 2.7 | 2.1 | 2.1 |
|                  |          | 2.9 | 2.5 | 2.0 |
|                  |          | 3.0 | 2.5 | 2.1 |
|                  |          | 2.5 | 2.3 | 1.4 |
| Santa Caterina 2 | Boxwork  | 8.8 | 5.7 | 5.1 |
|                  |          | 7.5 | 5.0 | 4.8 |
|                  |          | 6.1 | 5.7 | 4.3 |
|                  |          | 6.0 | 4.6 | 3.5 |
|                  |          | 5.3 | 3.8 | 2.6 |
|                  |          | 5.1 | 3.2 | 2.4 |
|                  |          | 5.0 | 4.7 | 3.6 |
|                  |          | 4.4 | 1.6 | 1.4 |
|                  |          | 4.1 | 3.8 | 2.7 |
|                  |          | 3.7 | 2.7 | 2.1 |
|                  | Pralines | 5.9 | 5.1 | 4.6 |
|                  |          | 5.1 | 4.0 | 2.7 |
|                  |          | 4.9 | 3.9 | 3.6 |
|                  |          | 4.9 | 4.2 | 3.3 |
|                  |          | 4.5 | 3.6 | 2.7 |
|                  |          | 4.9 | 3.9 | 2.9 |
|                  |          | 4.6 | 4.2 | 3.1 |
|                  |          | 4.8 | 3.8 | 2.3 |
|                  |          | 4.4 | 3.7 | 3.2 |
|                  |          | 4.3 | 3.9 | 3.0 |
|                  |          | 4.2 | 2.8 | 2.0 |
|                  |          | 3.5 | 2.3 | 2.0 |
|                  |          | 3.1 | 2.7 | 2.4 |
|                  |          | 3.7 | 2.3 | 2.1 |
|                  |          | 3.9 | 3.6 | 1.4 |
|                  |          | 4.4 | 2.2 | 1.2 |
|                  |          | 3.5 | 2.2 | 1.5 |
|                  |          | 3.4 | 3.1 | 1.4 |
|                  |          | 3.9 | 2.6 | 2.3 |
|                  |          | 3.6 | 3.1 | 1.8 |
|                  |          | 3.3 | 2.6 | 2.5 |
|                  |          | 3.3 | 2.7 | 2.4 |
|                  |          | 3.2 | 2.9 | 2.5 |
|                  |          | 3.0 | 2.1 | 1.5 |
|                  |          | 3.0 | 2.2 | 1.6 |
|                  |          | 2.7 | 2.0 | 1.2 |
|                  |          | 2.9 | 2.4 | 1.8 |
| Santa Caterina 3 | Boxwork  | 9.0 | 8.2 | 6.1 |
|                  |          | 7.7 | 5.7 | 4.8 |

---

|              |          |     |     |     |
|--------------|----------|-----|-----|-----|
|              |          | 6.7 | 4.7 | 3.2 |
|              |          | 5.0 | 4.6 | 3.2 |
|              |          | 5.0 | 3.8 | 3.7 |
|              |          | 5.3 | 4.4 | 2.8 |
|              |          | 2.7 | 1.8 | 1.4 |
|              | Pralines | 5.1 | 4.5 | 3.1 |
|              |          | 4.9 | 4.4 | 2.6 |
|              |          | 4.6 | 3.6 | 2.9 |
|              |          | 3.9 | 3.1 | 3.0 |
|              |          | 3.8 | 3.3 | 2.3 |
|              |          | 4.9 | 3.8 | 2.3 |
|              |          | 4.3 | 3.0 | 1.9 |
|              |          | 4.0 | 3.1 | 2.0 |
|              |          | 3.4 | 2.7 | 2.4 |
|              |          | 4.1 | 2.7 | 2.2 |
|              |          | 3.5 | 2.8 | 2.1 |
|              |          | 3.7 | 3.1 | 2.4 |
|              |          | 2.9 | 2.0 | 1.8 |
|              |          | 3.5 | 2.9 | 1.9 |
|              |          | 3.5 | 3.5 | 2.7 |
|              |          | 3.1 | 2.7 | 2.5 |
|              |          | 2.8 | 2.8 | 2.2 |
|              |          | 2.9 | 2.6 | 1.2 |
|              |          | 3.1 | 2.9 | 1.4 |
|              |          | 2.9 | 2.6 | 1.1 |
|              |          | 3.2 | 2.5 | 1.6 |
|              |          | 3.1 | 2.1 | 1.4 |
|              |          | 2.9 | 2.2 | 2.1 |
|              |          | 3.1 | 2.6 | 2.0 |
|              |          | 3.4 | 2.7 | 1.4 |
|              |          | 2.7 | 2.0 | 1.3 |
|              |          | 2.4 | 2.2 | 1.7 |
| Serpentara 1 | Pralines | 3.1 | 2.7 | 2.3 |
|              |          | 3.3 | 2.5 | 2.1 |
|              |          | 3.0 | 2.9 | 2.4 |
|              |          | 2.8 | 2.1 | 2.0 |
|              |          | 2.5 | 2.2 | 1.7 |
|              |          | 1.9 | 1.7 | 1.7 |
|              |          | 2.8 | 2.3 | 1.6 |
|              |          | 2.5 | 1.6 | 1.5 |
|              |          | 2.2 | 2.1 | 1.8 |
|              |          | 2.4 | 2.0 | 1.4 |
|              |          | 2.6 | 1.9 | 1.2 |
|              |          | 2.2 | 2.0 | 1.2 |
|              |          | 2.7 | 2.1 | 1.4 |
|              |          | 2.0 | 1.8 | 1.1 |
|              |          | 2.0 | 1.7 | 1.2 |
|              |          | 1.9 | 1.8 | 1.4 |

|              |          |     |     |     |
|--------------|----------|-----|-----|-----|
| Serpentara 2 | Pralines | 2.0 | 1.3 | 1.2 |
|              |          | 4.1 | 3.5 | 3.0 |
|              |          | 3.3 | 2.7 | 2.4 |
|              |          | 4.5 | 2.8 | 1.5 |
|              |          | 3.7 | 3.5 | 2.1 |
|              |          | 3.3 | 2.9 | 2.1 |
|              |          | 2.9 | 2.5 | 2.3 |
|              |          | 2.8 | 2.4 | 1.8 |
|              |          | 3.1 | 2.1 | 0.6 |
|              |          | 2.6 | 2.4 | 1.7 |
|              |          | 2.8 | 1.8 | 1.7 |
|              |          | 3.5 | 1.8 | 1.4 |
|              |          | 2.3 | 2.3 | 2.1 |
|              |          | 2.6 | 1.8 | 1.1 |
|              |          | 2.6 | 2.2 | 1.2 |
|              |          | 2.1 | 1.9 | 1.7 |
|              |          | 2.7 | 2.3 | 1.7 |
|              |          | 2.5 | 1.8 | 1.4 |
|              |          | 2.5 | 2.0 | 1.5 |
|              |          | 2.4 | 2.2 | 1.3 |
|              |          | 2.1 | 2.1 | 1.5 |
|              |          | 2.3 | 1.9 | 1.7 |
|              |          | 2.2 | 2.0 | 1.4 |
|              |          | 2.6 | 1.8 | 0.5 |
|              |          | 2.4 | 2.1 | 1.3 |
|              |          | 2.2 | 2.0 | 1.4 |
|              |          | 2.5 | 2.0 | 1.3 |
|              |          | 2.2 | 2.0 | 1.8 |
|              |          | 2.4 | 2.0 | 1.6 |
|              |          | 2.5 | 1.9 | 1.6 |
|              |          | 2.6 | 2.3 | 1.4 |
|              |          | 2.3 | 2.0 | 1.6 |
|              |          | 2.3 | 1.8 | 1.2 |
|              |          | 2.7 | 2.2 | 1.4 |
| 2.3          | 1.9      | 1.3 |     |     |
| Serpentara 3 | Pralines | 4.2 | 4.0 | 2.3 |
|              |          | 2.9 | 2.8 | 2.7 |
|              |          | 3.8 | 2.9 | 2.5 |
|              |          | 3.1 | 2.8 | 2.5 |
|              |          | 3.6 | 2.5 | 2.3 |
|              |          | 2.9 | 2.9 | 2.7 |
|              |          | 2.9 | 2.1 | 2.0 |
|              |          | 2.9 | 2.4 | 1.4 |
|              |          | 2.8 | 1.9 | 1.3 |
|              |          | 2.5 | 1.9 | 1.8 |
|              |          | 2.4 | 1.8 | 1.6 |
|              |          | 2.8 | 2.1 | 1.8 |
|              |          | 2.3 | 2.1 | 1.6 |

|     |     |     |
|-----|-----|-----|
| 2.3 | 2.2 | 0.8 |
| 2.1 | 2.0 | 1.6 |
| 2.4 | 1.8 | 1.6 |
| 2.4 | 1.5 | 1.2 |
| 2.3 | 1.9 | 1.5 |

---
